# Supplementary material
Source: Research Square preprint supplement (doi:10.21203/rs.3.rs-9264510/v1)

**Figure4A-HEC-1-A**

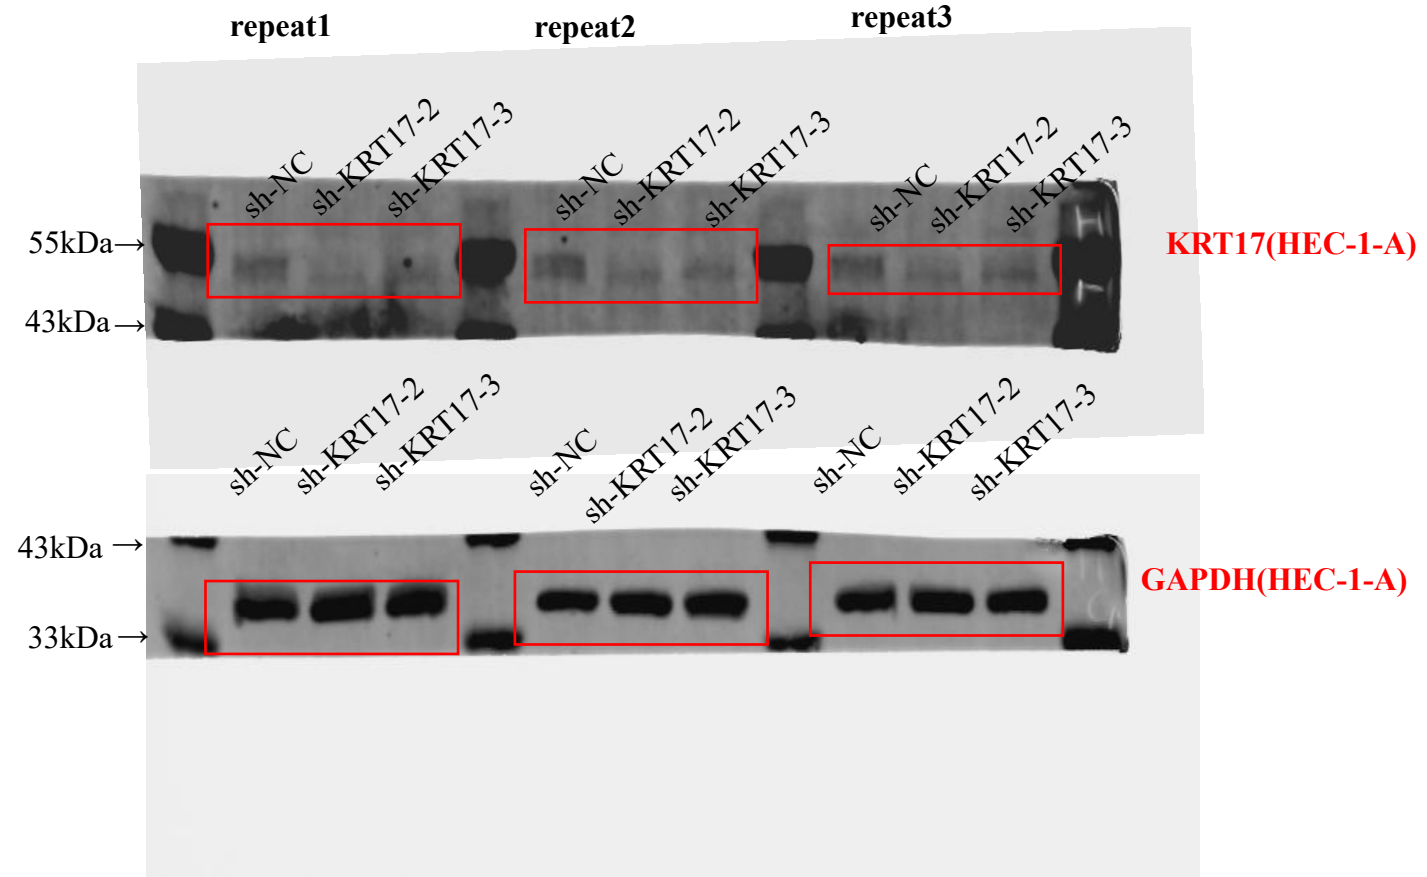

**Figure4A-Ishkawa**

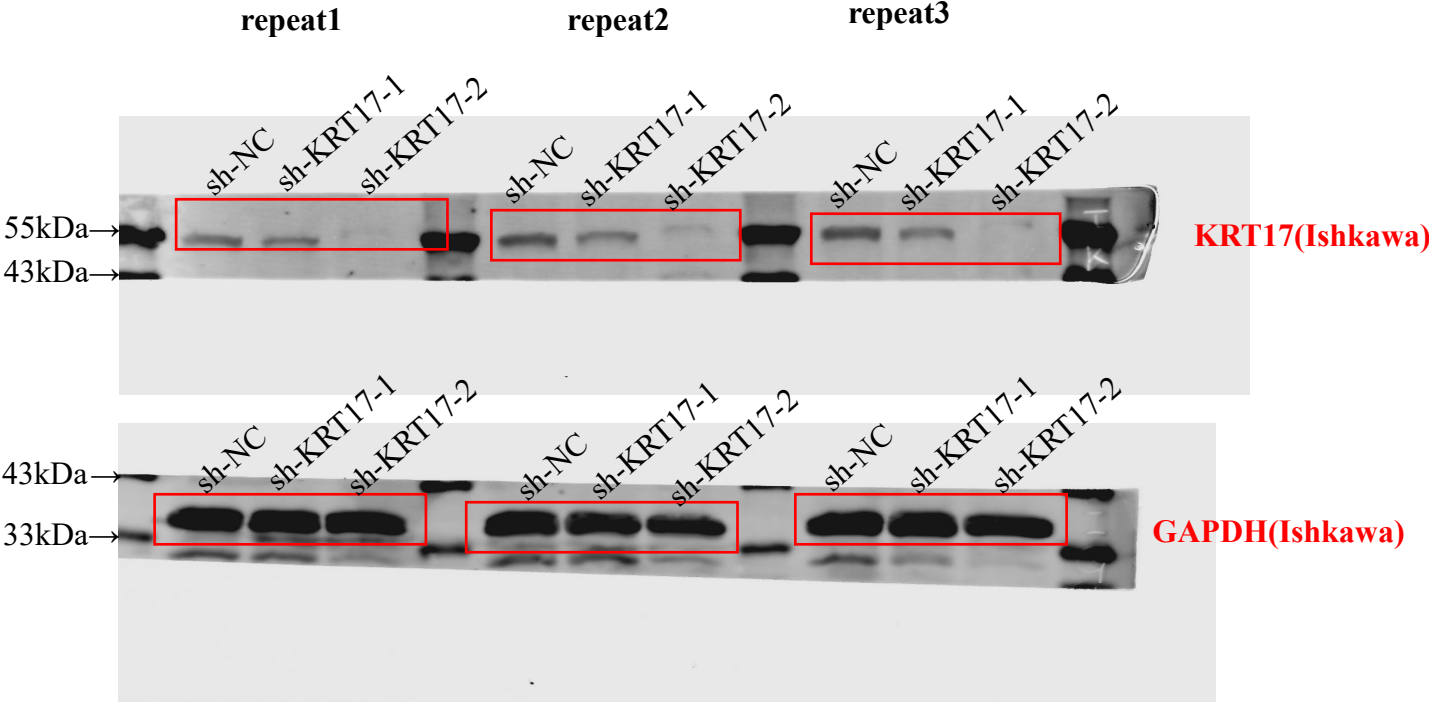

**Figure 5D-HEC-1-A**

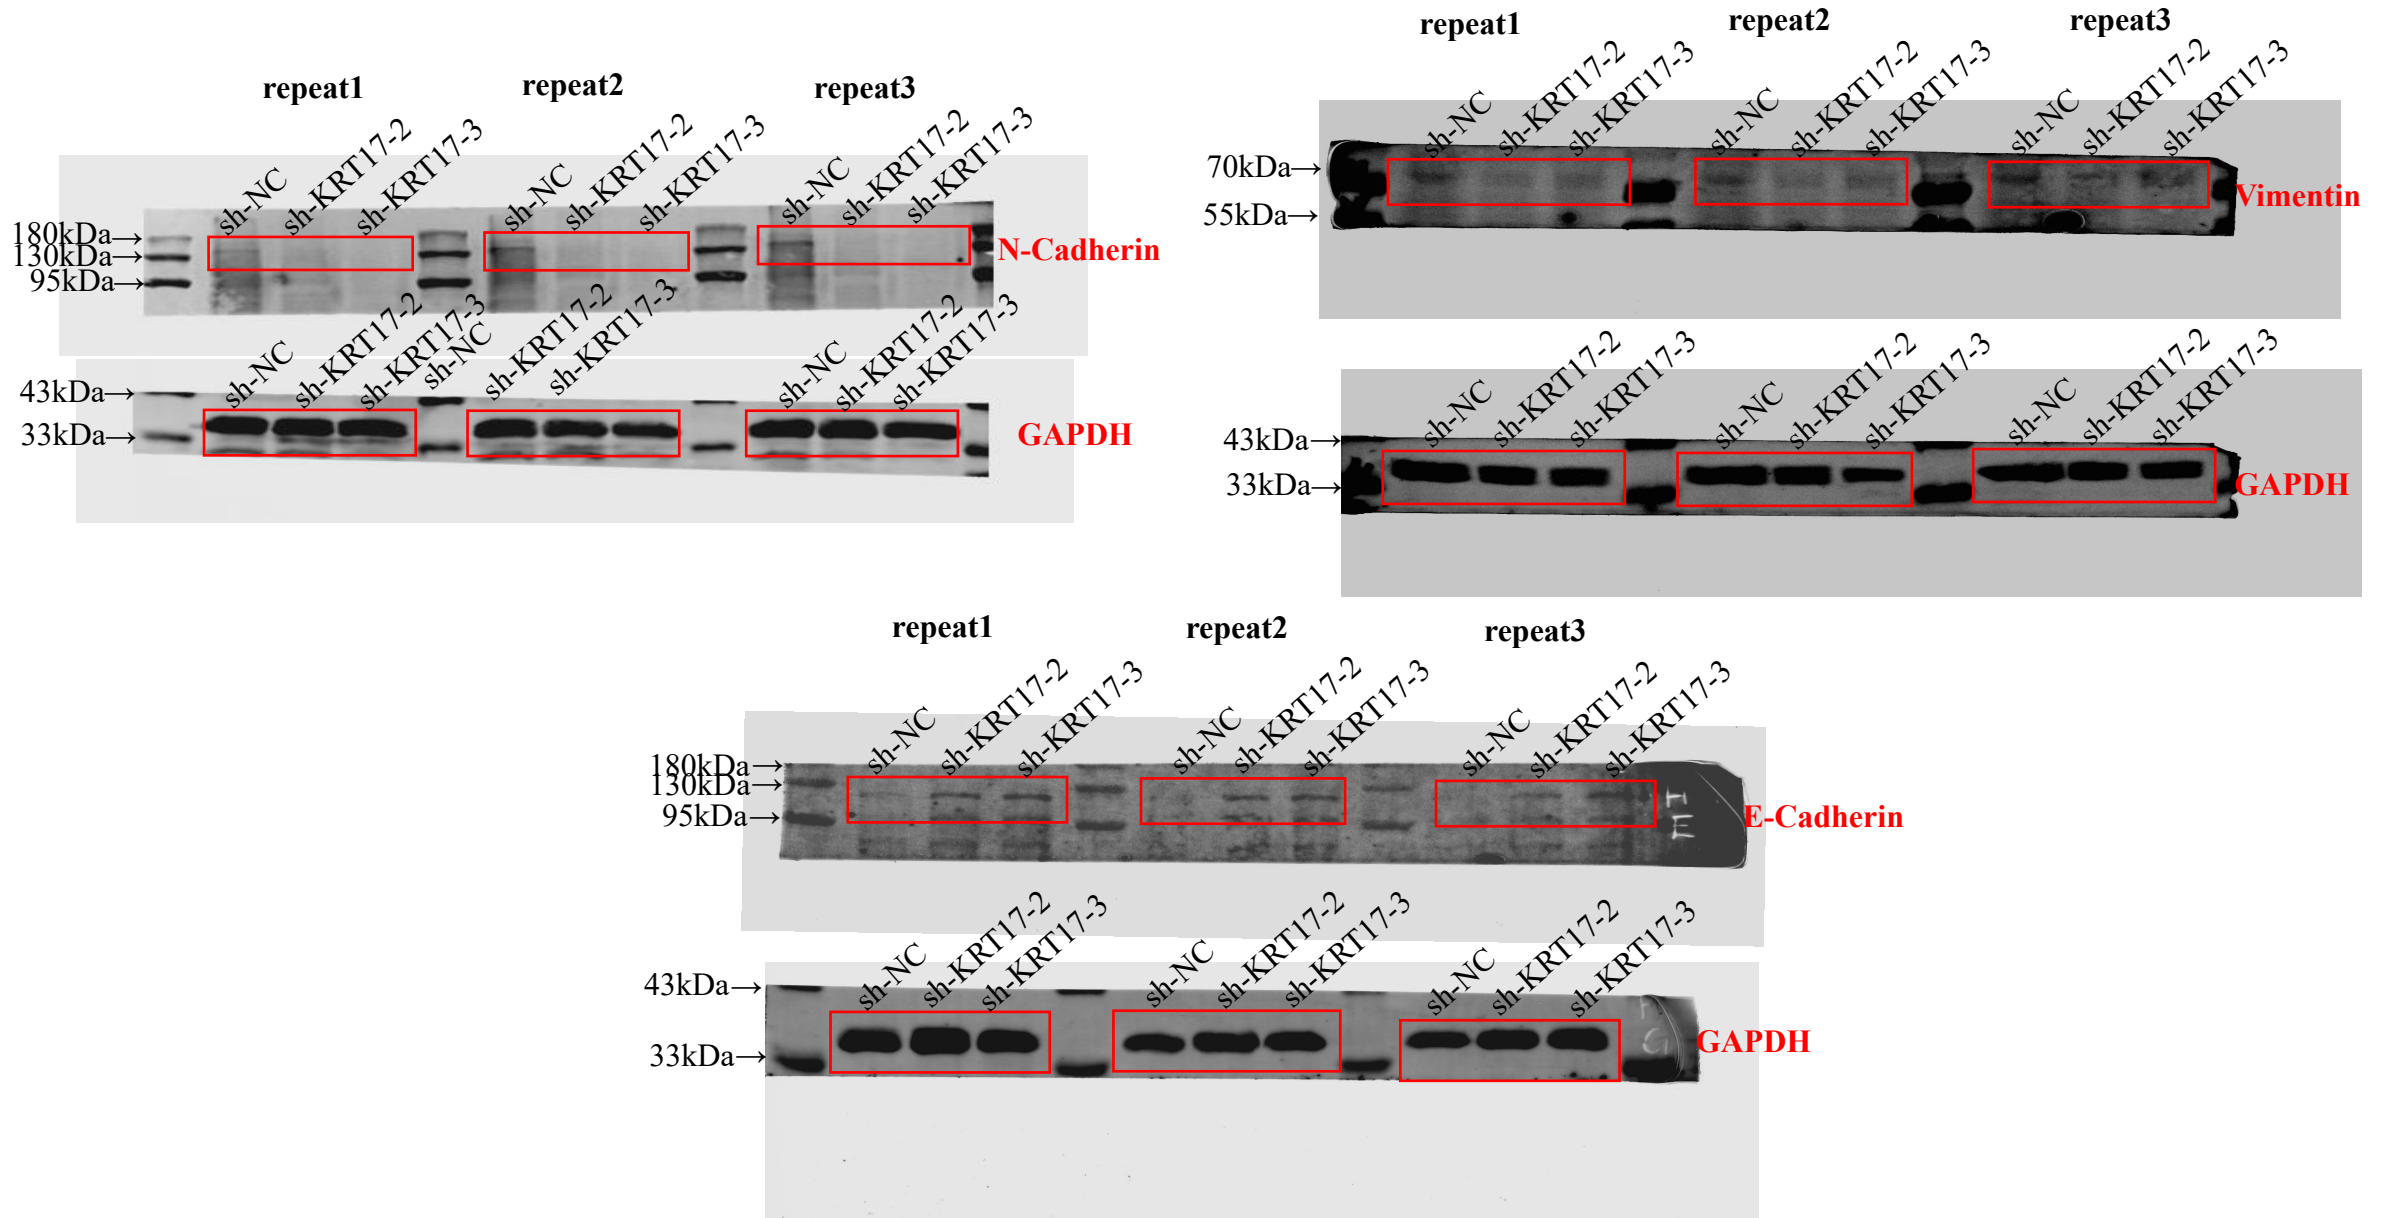

**Figure 5D-Ishkawa**

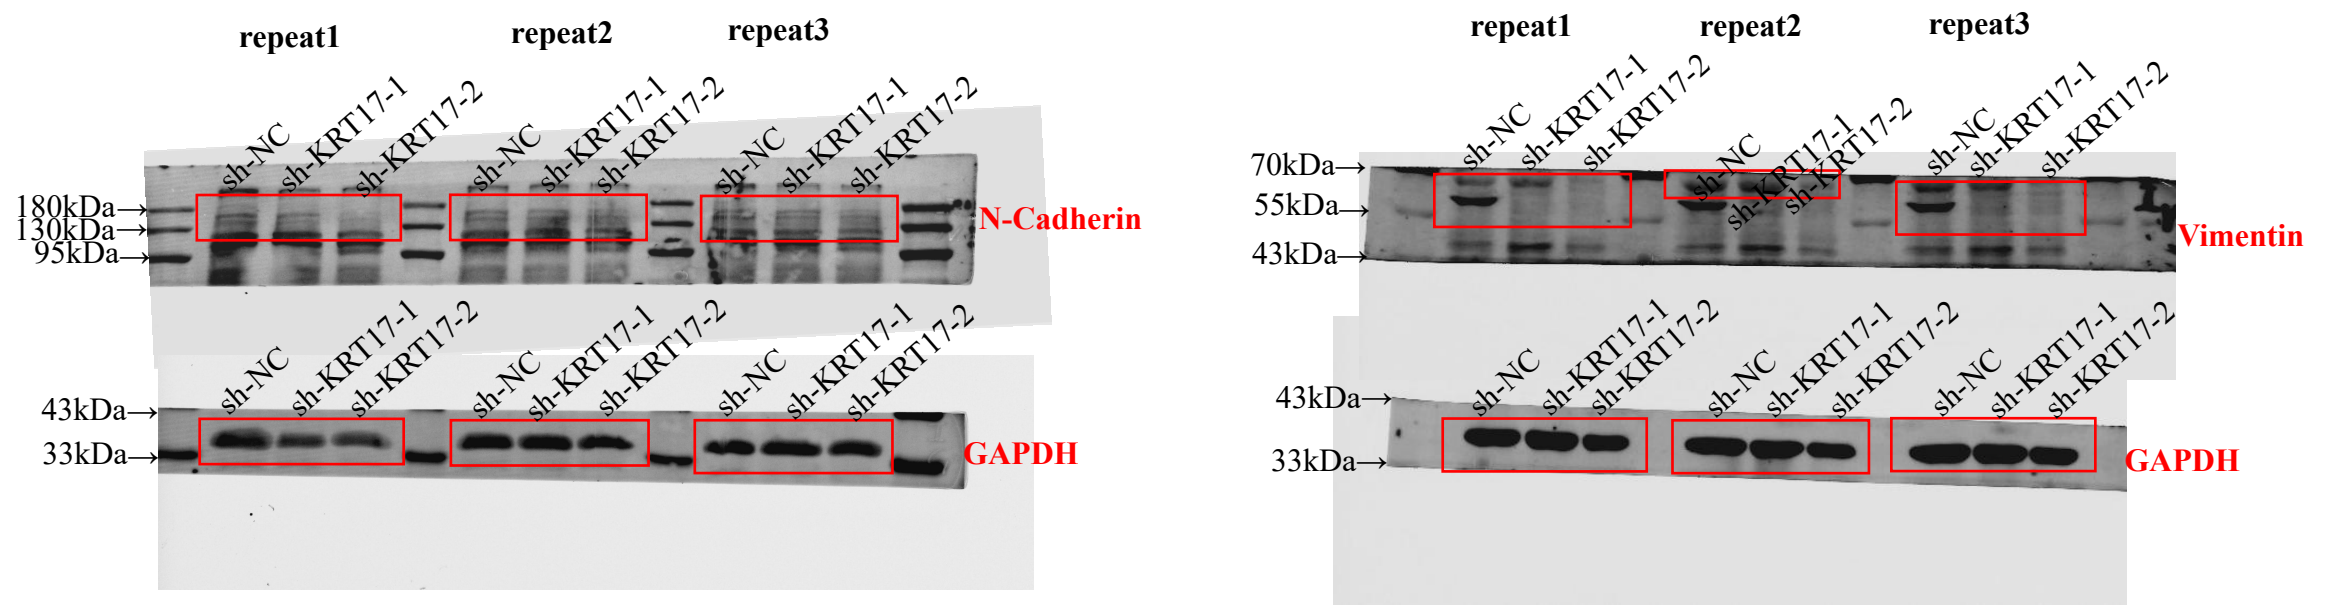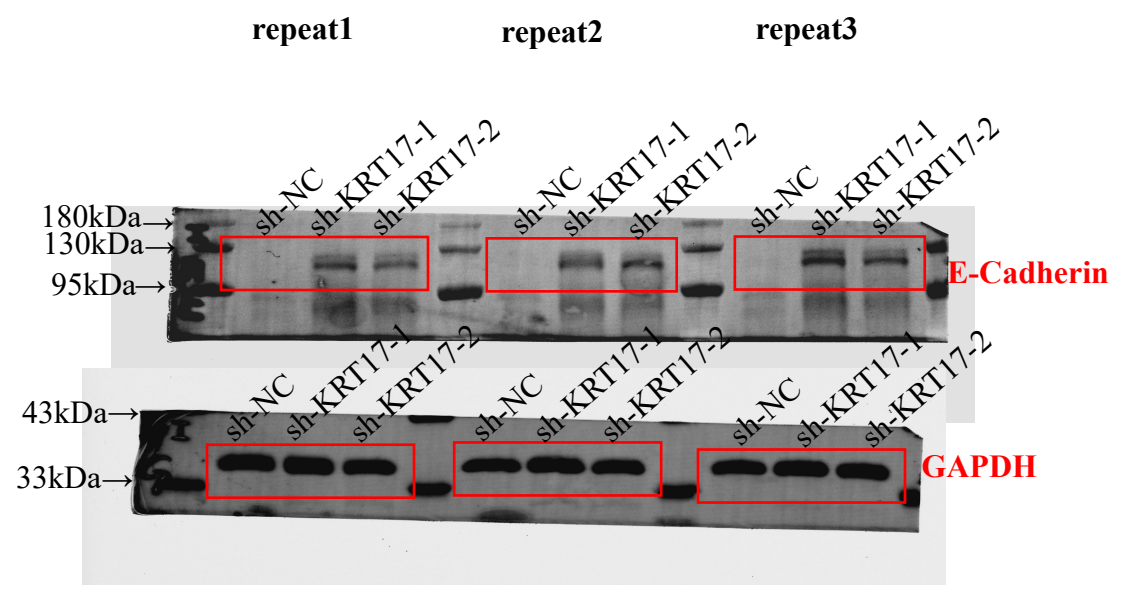

# Figure 6E-HEC-1-A

## repeat1

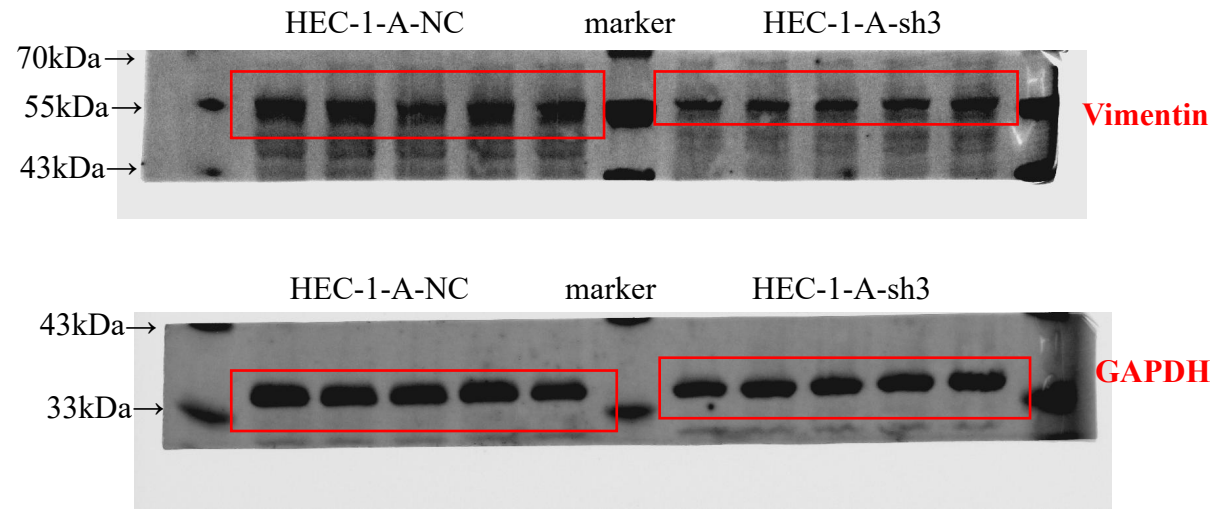

## repeat3

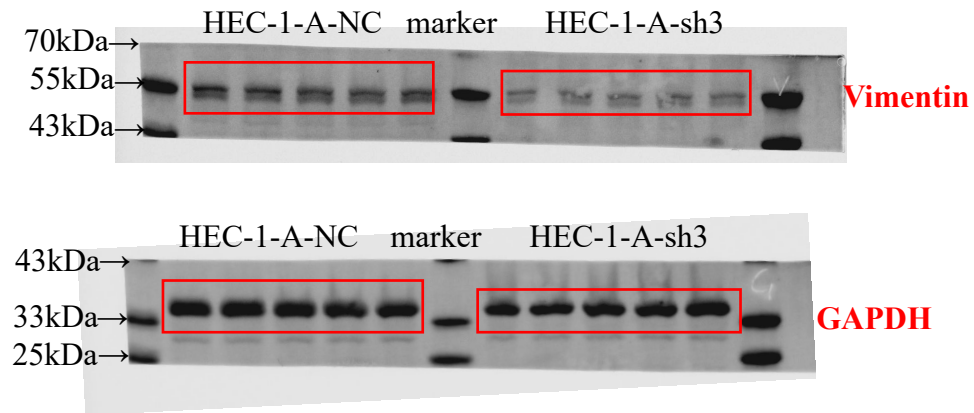

## repeat2

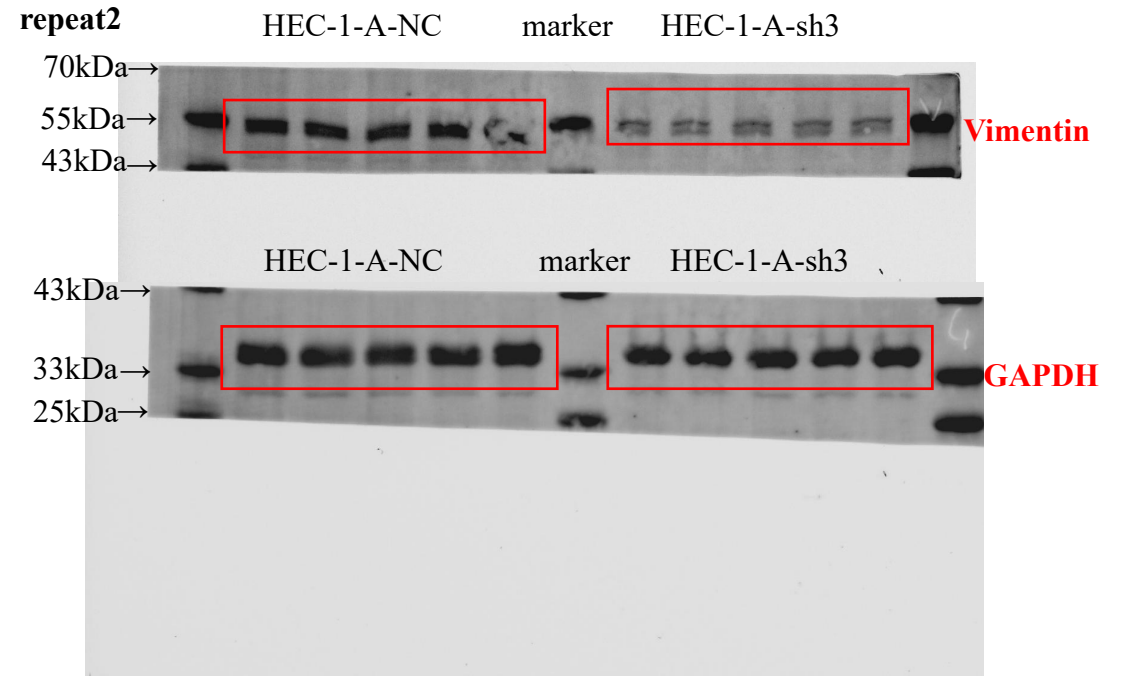

## repeat4

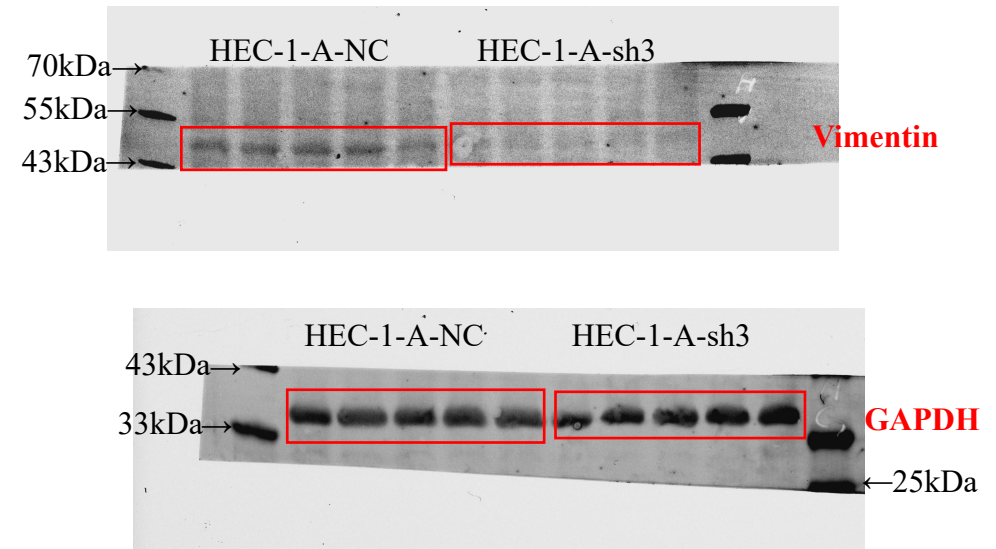

**Figure6E-HEC-1-A**

**repeat1**

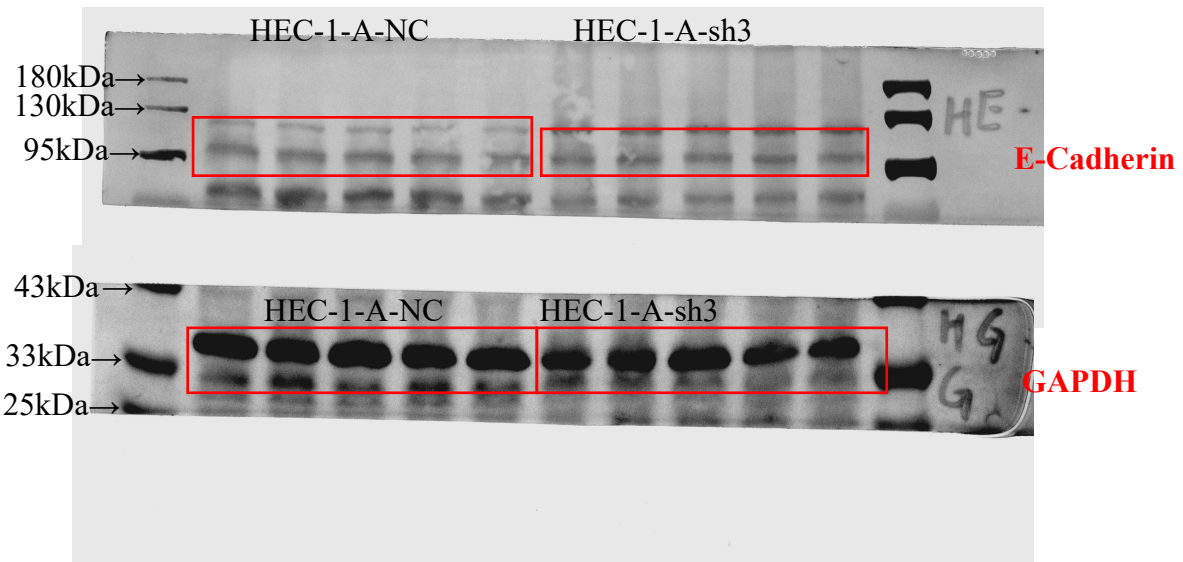

**repeat2**

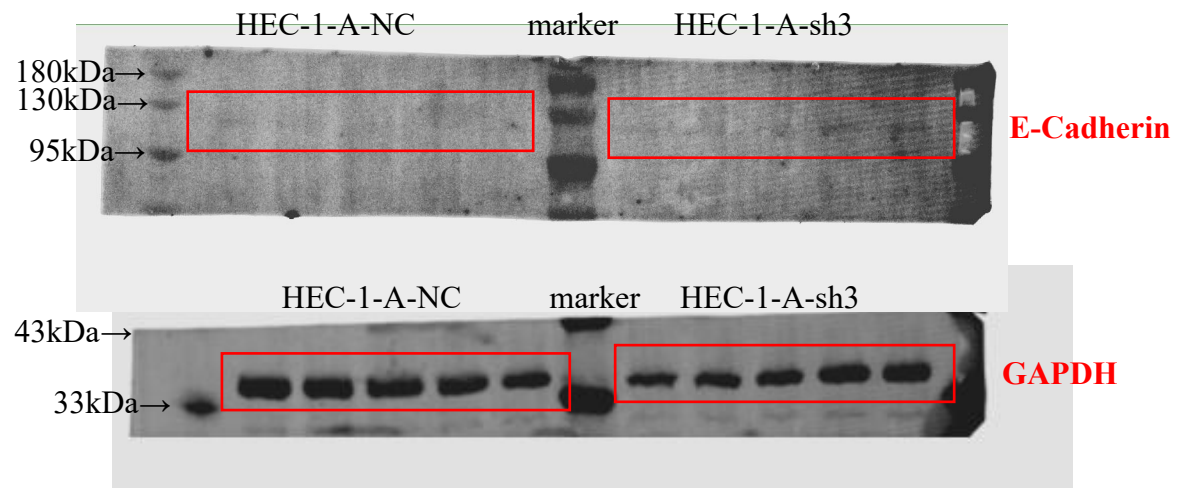

**repeat3**

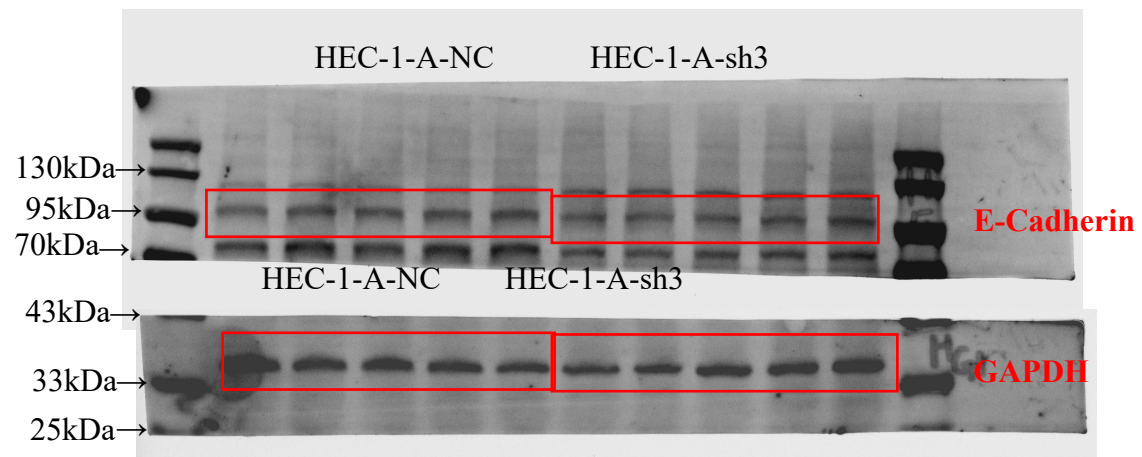

**Figure6E-HEC-1-A**

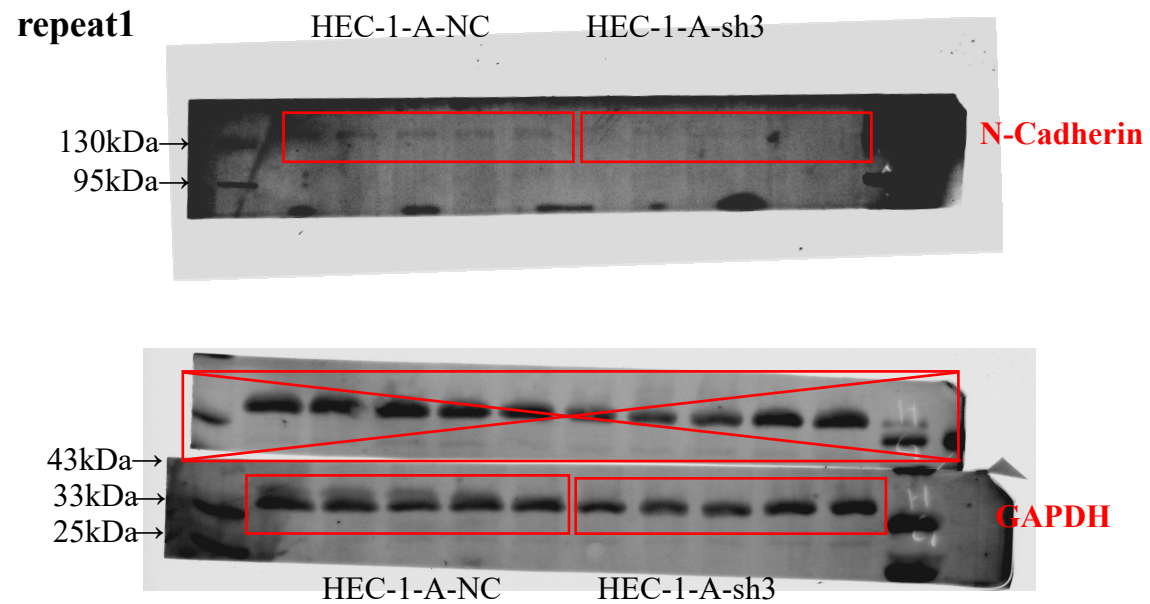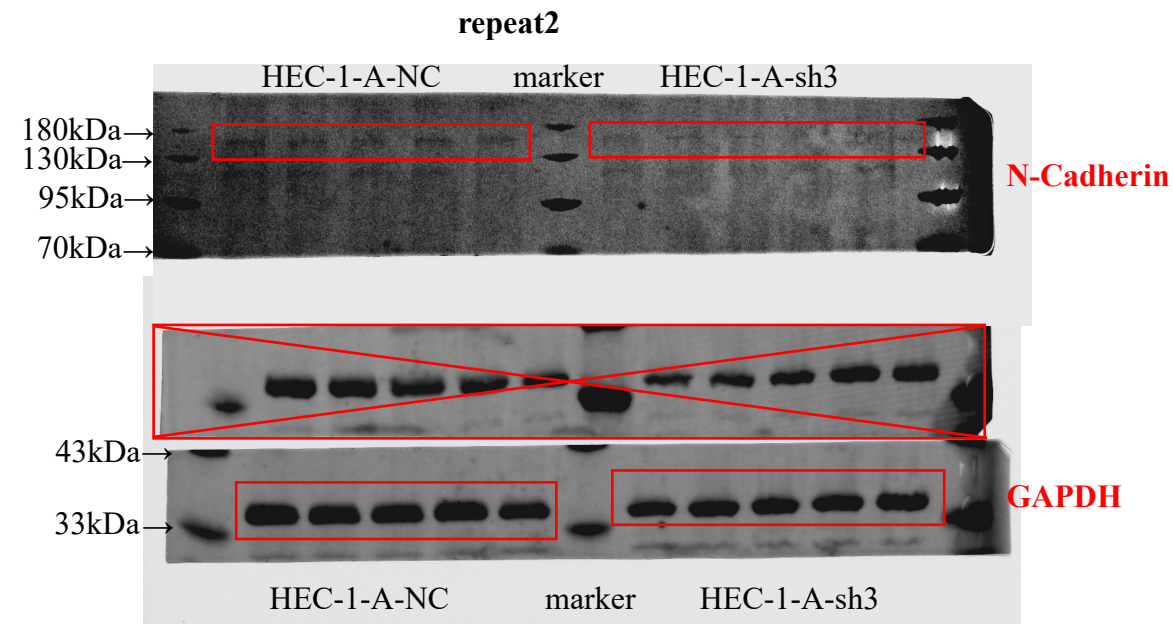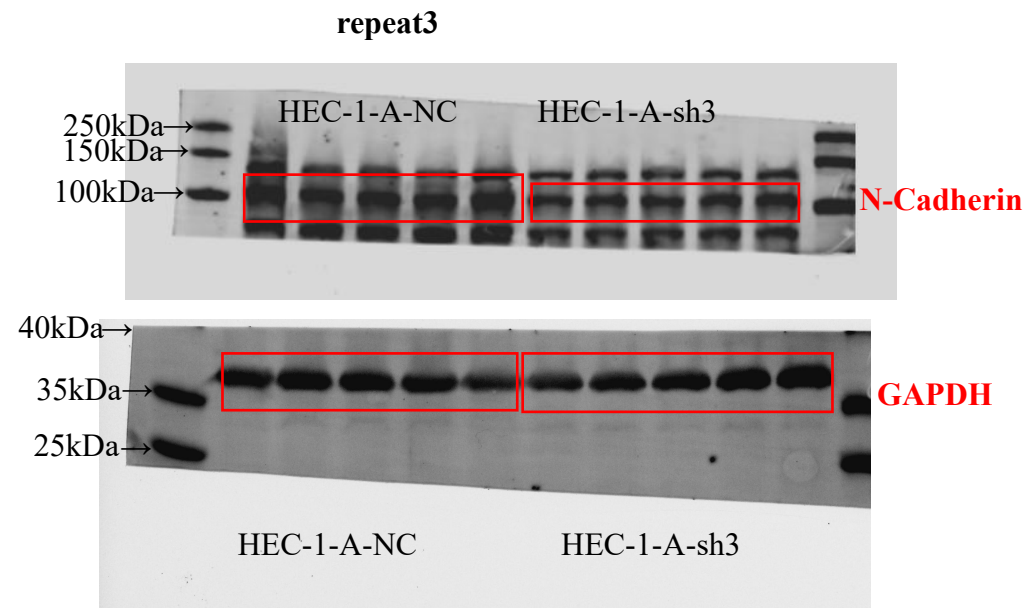

# Figure6E-Ishkawa

repeat1

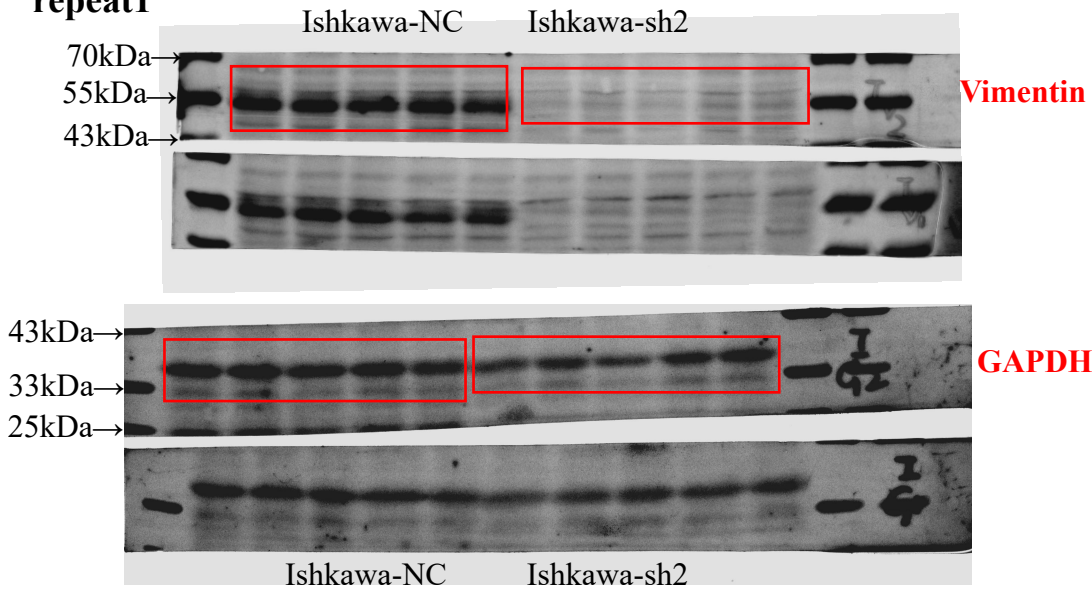

repeat2

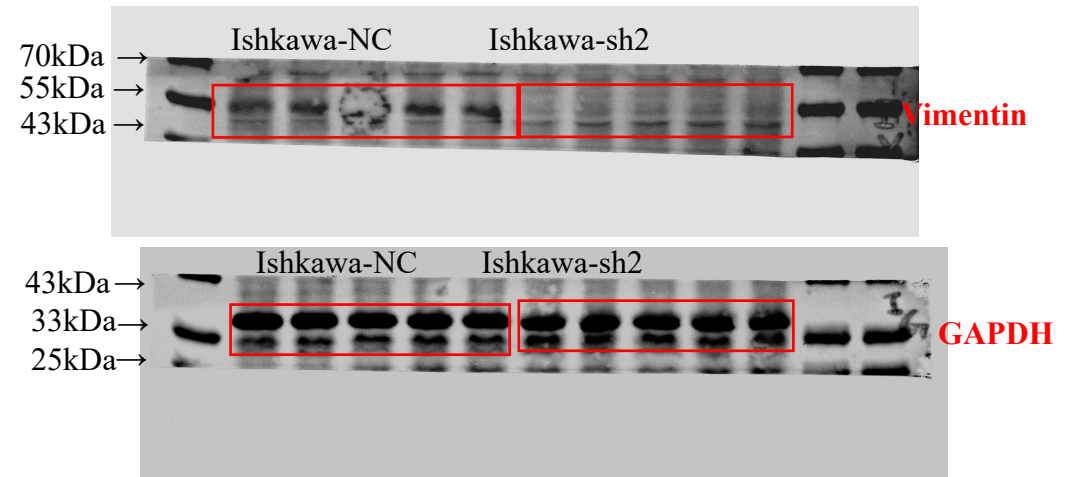

repeat3

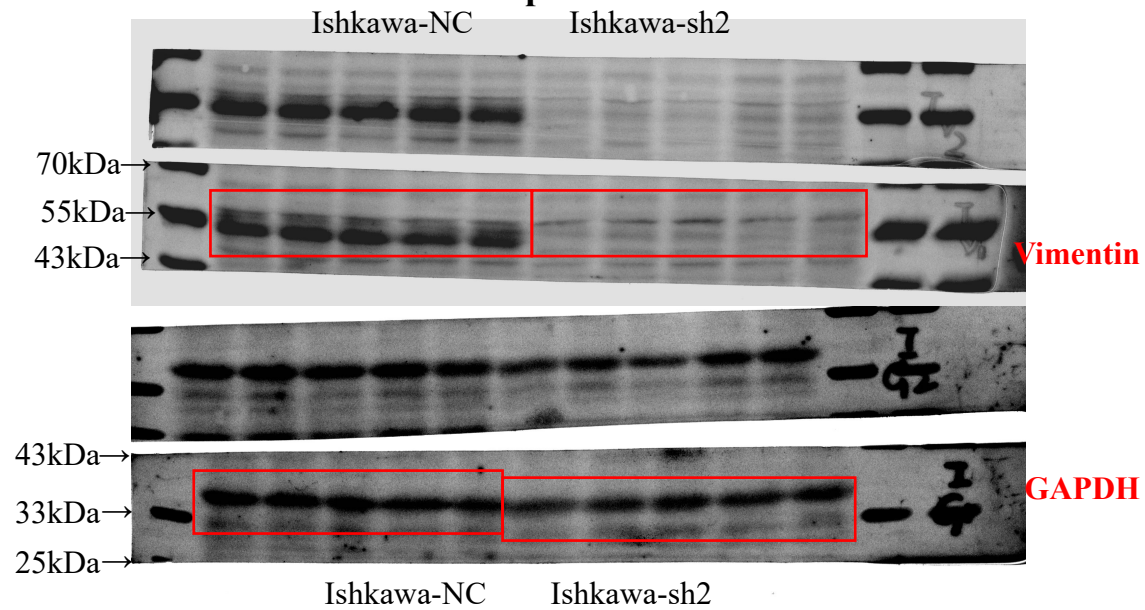

# Figure6E-Ishkawa

repeat1

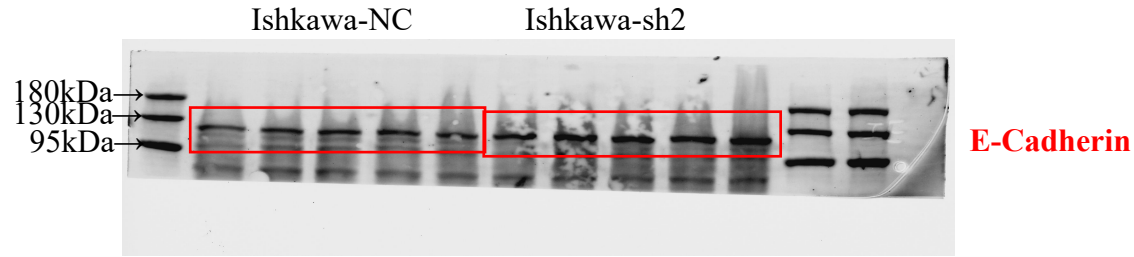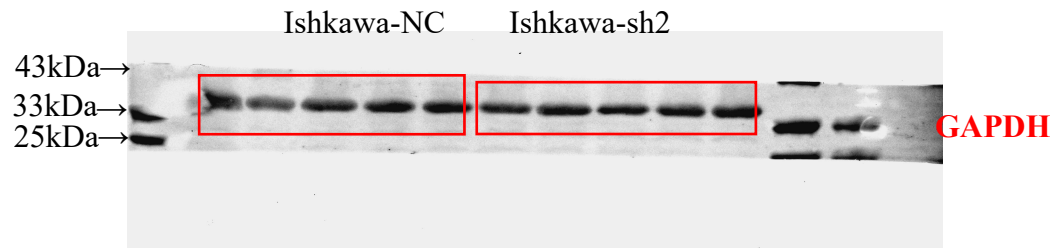

repeat2

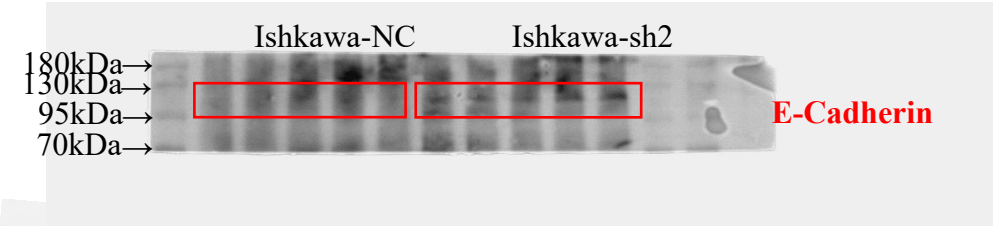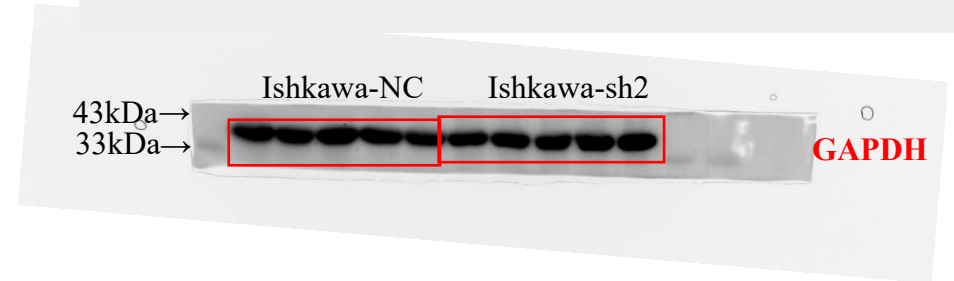

repeat3

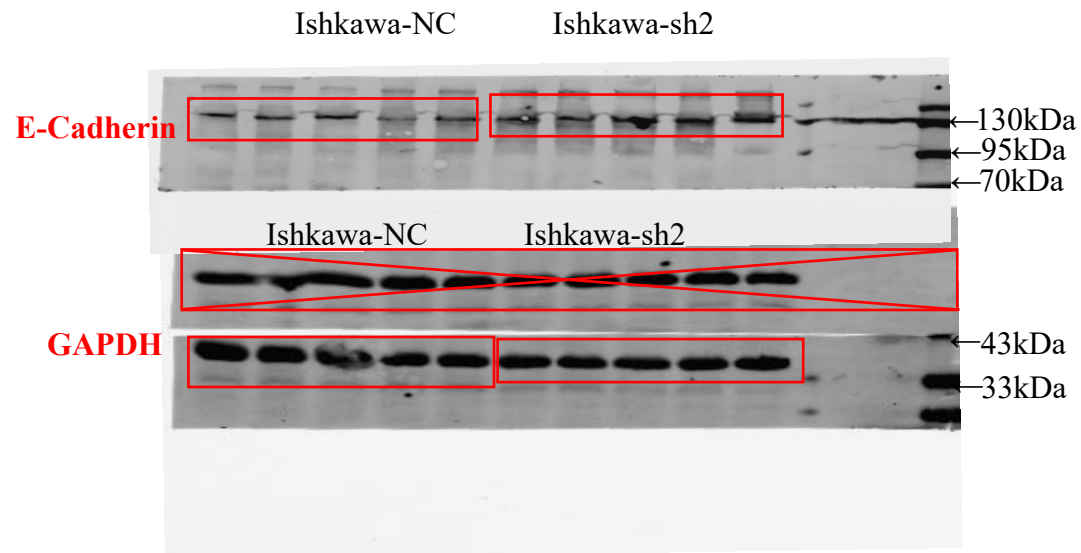

# Figure6E-Ishkawa

repeat1

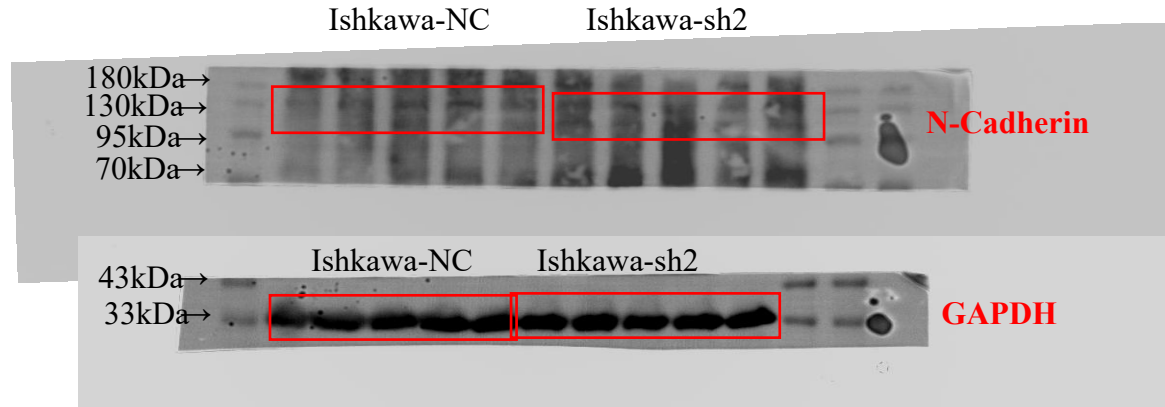

repeat2

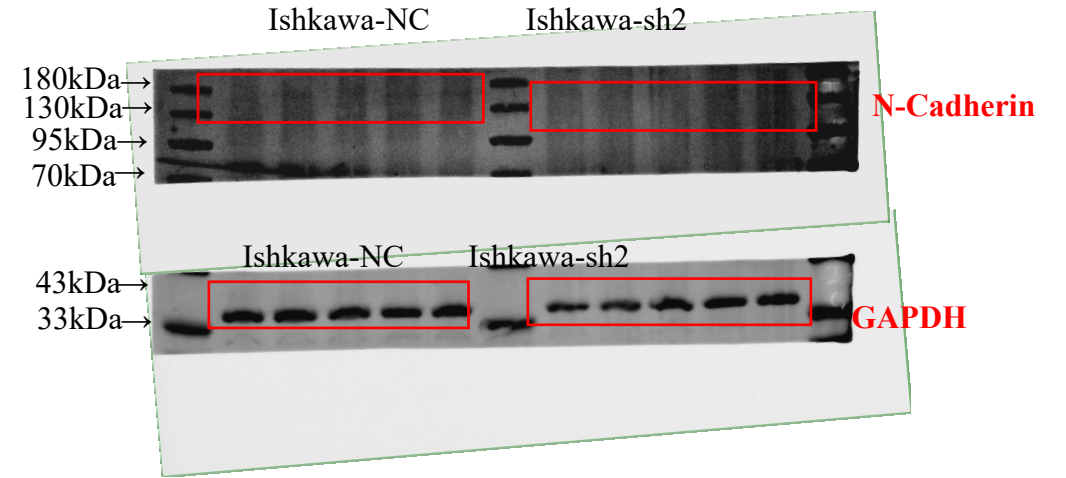

repeat3

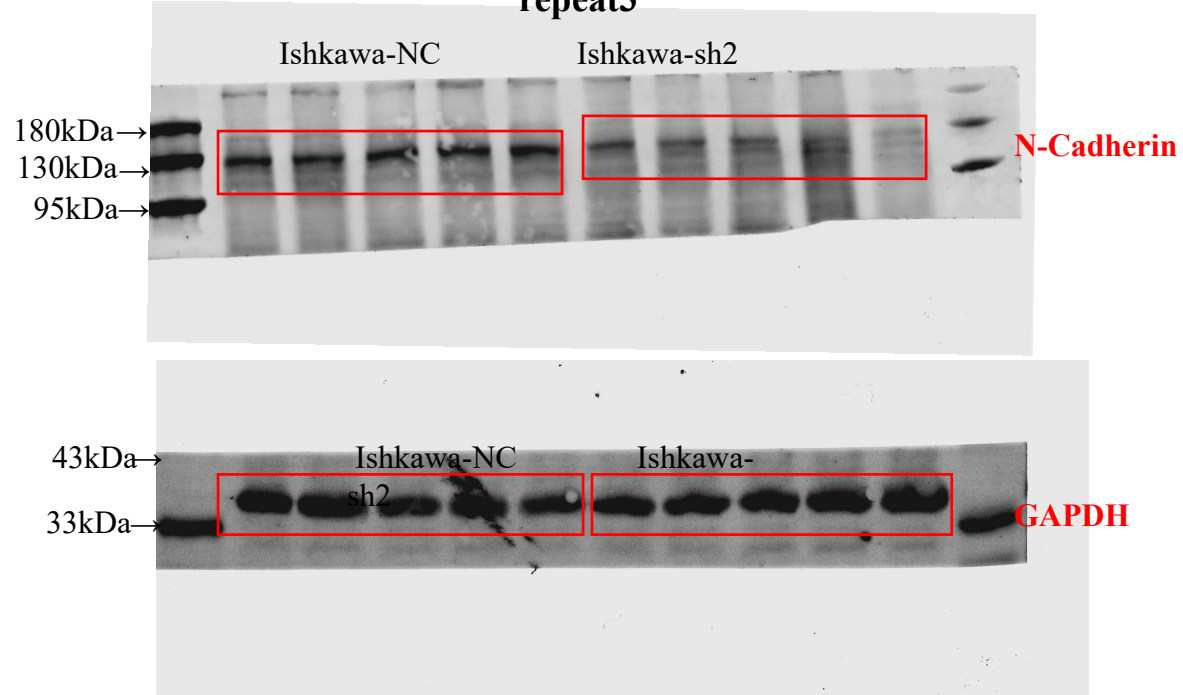

Supplement: Supplementary file 1 [file a7c254fb3d83fd7099c0834c.pdf]
