# Supplementary material
Source: Research Square preprint supplement (doi:10.21203/rs.3.rs-9264510/v1)
Supplement: Supplementary file 2 [file c490d5528f5cc477e41c0335.docx]

***Supplementary Material***

**Keratin 17 Drives Endometrial Cancer Aggressiveness via Epithelial-Mesenchymal Transition: A Single-Cell Transcriptomic and Integrative Bioinformatics Study**

| List of Supporting Information:  Supplementary Table 1. Sequences of shRNAs Targeting KRT17.  Supplementary Table 2. Sequences of primers used in cell lines.  Supplementary Table 3. Sequences of primers used in animal tissues.  Supplementary_Figures_Western_blot_replicates  **Supplementary Table 1. Sequences of shRNAs Targeting KRT17.** | |
| --- | --- |
| **shRNA ID** | **Sequence (5′ to 3′)** |
| sh-KRT17-1 | GACTCAGTACAAGAAAGAACC |
| sh-KRT17-2 | GTGACTACAGCCAGTACTACA |
| sh-KRT17-3 | GCCAACATCCTGCTACAGATT |

| **Supplementary Table 2. Sequences of primers used in cell lines.** | | |
| --- | --- | --- |
| **Gene** | **Forward Primer(5′–3′)** | **Reverse Primer(5′–3′)** |
| GAPDH | CACCATCTTCCAGGAGCGAG | TGATGACCCTTTTGGCTCCC |
| KRT17 | GGTGGGTGGTGAGATCAATGT | CGCGGTTCAGTTCCTCTGTC |
| E-Cadherin | GCTGGACCGAGAGAGTTTCC | CAAAATCCAAGCCCGTGGTG |
| N-Cadherin | GGGAAATGGAAACTTGATGGCA | CAGTTGCTAAACTTCACTGAAAGGA |
| Vimentin | CGAAACTTCTCAGCATCACG | GCAGAAAGGCACTTGAAAGC |

| **Supplementary Table 3. Sequences of primers used in animal tissues.** | | |
| --- | --- | --- |
| **Gene** | **Forward Primer(5′–3′)** | **Reverse Primer(5′–3′)** |
| GAPDH | TGATGGGTGTGAACCACGAG | AGTGATGGCATGGACTGTGG |
| E-Cadherin | AAGACGCTGAGCATGTGAAGAAC | TCTAACAGGACCAGGAGAAGAGTG |
| N-Cadherin | GAAGAAGGTGGAGGAGAAGAAGAC | GTACTGTGGCTCAGCATGGATAG |
| Vimentin | TGCTTCAAGACTCGGTGGAC | GGTCATTCAGCTCCTGCAGT |
